# Supplementary material for: In vivo functional analysis of a class A β-lactamase-related protein essential for clavulanic acid biosynthesis in Streptomyces clavuligerus
Source: PubMed Central journal article supplement (PMC6478378; doi:10.1371/journal.pone.0215960), 2019-04-23
Supplement: pone.0215960.s002.pdf [file pone.0215960.s002.pdf]

**S2 Fig.**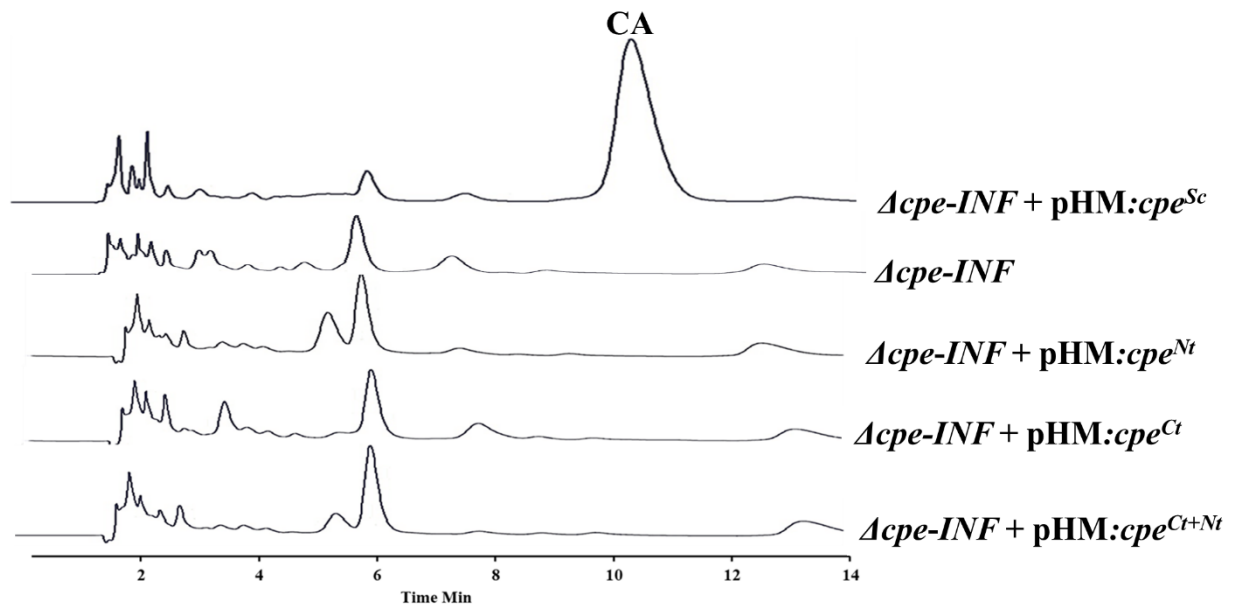

**S2 Fig.** HPLC analysis of 96 hour SA culture supernatants from the *S. clavuligerus*  $\Delta cpe-INF$  strain expressing full-length Cpe<sup>Sc</sup> (pHM:cpe<sup>Sc</sup>), its N-terminus (pHM:cpe<sup>Nt</sup>), C-terminus (pHM:cpe<sup>Ct</sup>) or both the N- and C-terminal domains at the same time as separate peptides (pHM:cpe<sup>Ct+Nt</sup>). The peak corresponding to imidazole-derivatized clavulanic acid (CA) is indicated and was only observed when the full length protein was used in the analysis.
