# Supplementary material for: In vivo functional analysis of a class A β-lactamase-related protein essential for clavulanic acid biosynthesis in Streptomyces clavuligerus
Source: PubMed Central journal article supplement (PMC6478378; doi:10.1371/journal.pone.0215960), 2019-04-23
Supplement: pone.0215960.s003.pdf [file pone.0215960.s003.pdf]

**S3 Fig.****>*Streptomyces jumonjinensis* (*cpe<sup>sl</sup>*)**

ATGATCGAAGCTGCCGGTCCGTCCCCAGCGCCGCCAGGCCGCGCTCGCCGCCGACGGTCCCCGATGGGCGAGGCGGCC  
 GGTGGGCGGTGAATTTACTCACGGCGCCGACATCGCCTCTGACGAGGAAATGGCCGCACGTTTCATGCCACCTTCGGGGCC  
 GGAGTCGCGGGCAAGTTCTCCCCACTCTTCGCGAGTGGCGGGCGCAGGGCCCCTACACCGTCGAGGACTACCAGGCGGTG  
 CCCACAAGAGCTGGGTACGCTGACGGGGCCTCGGGCGAACGCCACACCCTGTCGCTGACGCTCGACTCCAACGGGGTGAT  
 CCGCATCCTCACCTCCGGCCCCGAAATGGCGATCCCGCAGACGCGGACCTGGGACGAGCTGGAGGAGGCGCTGCGCATAACC  
 GGCATCGAGCACTCCGTGCTCGCCGCCGGCTCACCCCTCGGGGCCGTCGTCCTGCATGAGACGGACGCCGACCGGCCGAT  
 GGCCACCGGTTCGGCGAACAAAGCTCTATGTGATGCGCGCGCTCATCGAGGCGCTGGAGAGCGGGAAGATCAGCTGGGACGA  
 CGAGGTCACCGTCACACCGGAGCTGCGCAGTCTGCCACGGGCGATATGACGAGCCTCCCGACGGGACCCGGGTCTCGGTG  
 CGCGAGACGGCGACAAGATGATCGTGCTGAGCGACAACACGGCCGCCGACATCTTCGTGGACCGGCTGGGCCGGGACGCC  
 GTGGAGCGCGCGTGGCGGCTCCGGGCACCATGACCCGGCCCTGATGCGTCCGTTCTGAGCAGCCAGGAGTTCTCGAAC  
 TCGGCTGGGGCGCGCGGGAGAGGCGTGCCGAGTGGACGCGGGCGGACGAGGCCGGGCGGCGGAGATGCTGCGCGGGAT  
 CACCGGGCCGATGACCGTGCGCGGCTCCGACCTGGGCGAGACGGTGACACAGCTGGGCATCGACTGGATGATGAACGCCTAC  
 GACGTGCTCCATGTCCTGGCGGGGCTCATGGAGGACAGTGGAGCGGGATAACCACCGGCGCCGTCGAGCGGATCCTGACCGCCT  
 ATCCGGGCATCGTCGCCACCCGCCATCTGGGGCAGGGTGTACTTCAAGGCCGGCTCGTCCCCGGCGTGATGATGTTCTGC  
 TGGCTGCTCCAGAACCGGGCCGGCGAAACGTATGTCCTGGTGTGTCGGCAGATGGCCGATGAGCAGAAGCCCATCGGCGAC  
 GGCCTGTATCTGCGCGGAGTCGGCGCCCGTGCATCGAGTCCGGCCTGCTGGAGTCCGGCGCGGCCGTCGGCGCGCGGCCA  
 GACAGGCGGACGGGGTCAGCACCCCATGA

**>*Streptomyces katsurahamanus* (*cpe<sup>sk</sup>*)**

ATGATCGAAGCTGCCGGTCCGTCCCCAGCGCCGCCAGGCCGCGCTCGCCGCCGACGGTCCCCGATGGGCGAGGCGGCC  
 GGTGGGCGGTGAATTTACTCACGGCGCCGACATCGCCTCTGACGAGGAAATGGCCGCACGTTTCATGCCACCTTCGGGGCC  
 GGAGTCGCGGGCAAGTTCTCCCCACTCTTCGCGAGTGGCGGGCACAGGGCCCCTACACCGTCGAGGACTACCAGGCGGTG  
 CCCACAAGGGCTGGGTACGCTGACGGGACCGGCGGGCGAACGCCACACCCTGTCGCTGACGCTCGACTCCAACGGGGTGAT  
 CCGCATCCTCACCTCCGGCCCCGAGATGGCGATCCCCAGACGCGGACCTGGGACGAGCTGGAGGAGGCGCTGCGCATAACC  
 GGCATCGAGCACTCCGTGCTCGCCGCCGGCTCACCCCTCGGGGCCGTCGTCCTGCATGAGACGGACGCCGACCGGCCGAT  
 GGCCACCGGTTCGGCGAACAAAGCTCTATGTGATGCGCGCGCTCATCGAGGCGCTGGAGAGCGGGAAGATCAGCTGGGACGA  
 CGAGGTCACCGTCACACCGGAGCTGCGCAGTCTGCCACGGGCGATATGACGAGCCTCCCGACGGGACCCGGGTCTCGGTG  
 CGCGAGACGGCGACAAGATGATCGTGCTGAGCGACAACACGGCCGCCGACATCTTCGTGGACCGGCTGGGCCGGGACGCC  
 GTGGAGCGCGCGTGGCGGCTCCGGGCACCATGACCCGGCCCTGATGCGTCCGTTCTGAGCAGCCAGGAGTTCTCGAAC  
 TCGGCTGGGGCGCGCGGGAGCGGCGCGCCGAGTGGACGCGGGCGGACGAGGCCGGGCGGCGGAGATGCTGCGCGGGAT  
 CACCGGGCCGATGGCCGTGCGCGGCTCCGACCTGGGCGAGACGGTGACACAGCTGGGCATCGACTGGATGATGAACGCCTAC  
 GACGTGCTCCATGTCCTGGCGGGGCTCATGGAGGACAGCGAGCGGGATAACCACCGGCGCCGTCGAGCGGATCCTGACCGCCT  
 ATCCGGGCATCGTCGCCACCCGCCATCTGGGGCAGGGTGTACTTCAAGGCCGGCTCGTCCCCGGCGTGATGATGTTCTGC  
 TGGCTGCTCCAGAACCGGGCCGGCGAAACGTACGTCCTGGTGTGTCGGCAGATGGCCGACGAGCAGAAGCCCATCGGCGAC  
 GGCCTGTATCTGCGCGGAGTCGGCGCCCGTGCATCGAGTCCGGCCTGCTGGAGTCCGGCGCGGCCGTCGGCGCGCGGCCA  
 GACAGGCGGACGGGGTCAGCACCCCATGA

**S3 Fig.** DNA sequences of *cpe* homologues from *S. jumonjinensis* and *S. katsurahamanus*. The complete gene sequences starting from initiation (ATG) to the stop (TGA) codon for each gene were determined as part of the current study and are reported.
