# Supplementary material for: In vivo functional analysis of a class A β-lactamase-related protein essential for clavulanic acid biosynthesis in Streptomyces clavuligerus
Source: PubMed Central journal article supplement (PMC6478378; doi:10.1371/journal.pone.0215960), 2019-04-23
Supplement: pone.0215960.s006.pdf [file pone.0215960.s006.pdf]

S6 Fig.

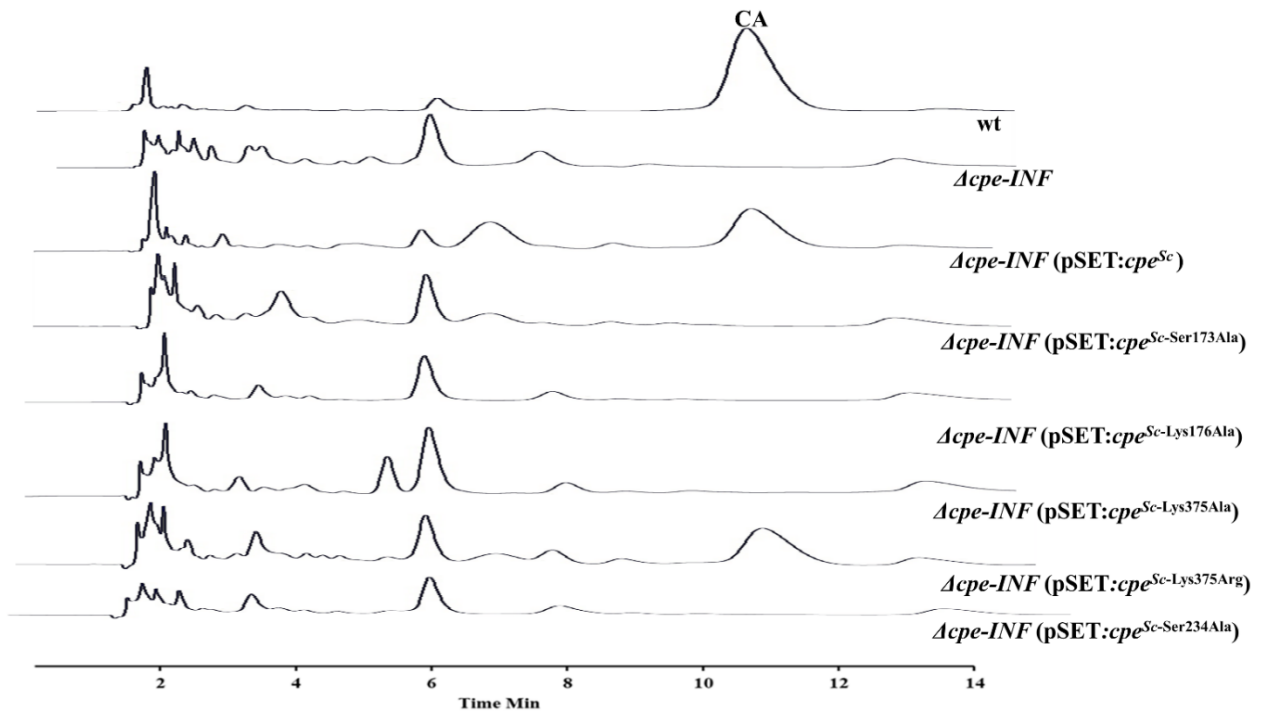

**S6 Fig.** HPLC analysis of 96 hour *S. clavuligerus* SA culture supernatants from the wt strain for comparison with the  $\Delta cpe-INT$  mutant expressing Cpe<sup>Sc</sup> or select single amino acid variants (Ser<sub>173</sub>Ala, Lys<sub>176</sub>Ala, Lys<sub>375</sub>Ala, Lys<sub>375</sub>Arg Ser<sub>234</sub>Ala) of the protein *in trans* using plasmid pHM11a. Clavulanic acid (CA) production was monitored at 311nm following imidazole derivatization.
