# Supplementary material for: In vivo functional analysis of a class A β-lactamase-related protein essential for clavulanic acid biosynthesis in Streptomyces clavuligerus
Source: PubMed Central journal article supplement (PMC6478378; doi:10.1371/journal.pone.0215960), 2019-04-23
Supplement: pone.0215960.s007.pdf [file pone.0215960.s007.pdf]

**S1 Table.** Oligonucleotide primers used for cloning and sequencing in the current study.

| Primer Name           | Primer Sequence 5'→3'                                                                                                                                                         | Description                                                                                                                        |
|-----------------------|-------------------------------------------------------------------------------------------------------------------------------------------------------------------------------|------------------------------------------------------------------------------------------------------------------------------------|
| <i>cpe</i> -RD-F/R    | (F) ATG ATG AAG AAA GCT GAT TCC GTC CCG ACC CCG<br>GCT GAG ATT CCG GGG ATC CGT CGA CC<br>(R) TCA TCG CCG GGC GGC TTC TCC GGC GCT CGC GCG<br>GTC GTC TGT AGG CTG GAG CTG CTT C | Forward (F) and reverse (R) primers for introduction of <i>apra-oriT</i> cassette in place of <i>cpe</i> in cosmid 12B8 (ReDirect) |
| <i>cpe</i> -CONF-F/R  | (F) CCG ACA AGG AGC GAT GAT GA<br>(R) GGA TCA CAC CGA AGC CCA GT                                                                                                              | Forward (F) and reverse (R) primers for confirming deletion of <i>cpe</i> in cosmid 12B8                                           |
| pIJ773-R              | TCG CTA TAA TGA CCC CGA AG                                                                                                                                                    | Sequencing primer used for confirming insertion of <i>apra-oriT</i> cassette in place of <i>cpe</i>                                |
| pWE15-amp-RD-F/R      | (F) TGA TAA ATG CTT CAA TAA TAT TGA AAA AGG AAG<br>AGT ATG ATT CCG GGG ATC CGT CGA CC<br>(R) AATCTAAAG TAT ATA TGA GTA AAC TTG GTC TGA<br>CAG TTA TGT AGG CTG GAG CTG CTT C   | Forward (F) and reverse (R) primers for introduction of <i>hyg-oriT</i> cassette in place of <i>amp</i> in cosmid 12B8 (ReDirect)  |
| pIJ799-F/R            | (F) CCCTGATAATGCTTCAATAATATGAAAA<br>(R) AAT CAA TCT AAA GTA TAT ATG AGT AAA CTT GGT C                                                                                         | Forward (F) and reverse (R) primers for confirming replacement of <i>amp</i> in cosmid 12B8                                        |
| HygR-F/R              | (F) CGC ATA GAC GTC GGT GAA GT<br>(R) TAC CTG GTG ATG AGC CGG AT                                                                                                              | Forward (F) and reverse (R) primers for confirming presence/absence of <i>hyg</i> in <i>cpe</i> mutants                            |
| <i>blip</i> -FLAG-F/R | (F) ATA CAT ATG AGG ACA GTG GGG ATC G<br>(R) ATG GAT CCT CAC TTG TCG TCG TCG TCC TTG TAG<br>TCT ACA AGG TCC CAC TGC CGC TTG                                                   | Forward (F) and reverse (R) primers for amplification of <i>blip</i> from <i>S. clavuligerus</i> with C-terminal FLAG tag          |
| <i>ccaR</i> -FLAG-F/R | (F) TAC ATA TGA ACA CCT GGA ATG ATG TGA C<br>(R) ATG GAT CCT CAC TTG TCG TCG TCG TCC TTG TAG<br>TCG GCC GGG GTA CCG ACC                                                       | Forward (F) and reverse (R) primers for amplification of <i>ccaR</i> from <i>S. clavuligerus</i> with C-terminal FLAG tag          |
| <i>cpe</i> -FLAG-F/R  | (F) TAC ATA TGA TGA AGA AAG CTG ATT CCG TC<br>(R) ATG GAT CCT CAC TTG TCG TCG TCG TCC TTG TAG<br>TCT CGC CGG GCG GCT TC                                                       | Forward (F) and reverse (R) primers for amplification of <i>cpe</i> from <i>S. clavuligerus</i> with C-terminal FLAG tag           |
| <i>cpe</i> -SC-F/R    | (F) TAATA CAT ATG ATG AAG AAA GCT GAT TCC G<br>(R) TGATA GGA TCC TCA TCG CCG GGC GGC TTC                                                                                      | Forward (F) and reverse (R) primers for amplification of <i>cpe</i> from <i>S. clavuligerus</i>                                    |
| <i>cpe</i> -SF-F/R    | (F) ATTACATATGA TCG ATC TAC CCG GTT CCG<br>(R) TAATAAGCTTC ACCGGG AGG TGC CGG                                                                                                 | Forward (F) and reverse (R) primers for amplification of <i>cpe</i> from <i>S. flavogriseus</i>                                    |
| <i>cpe</i> -SV-F/R    | (F) TATACATATGT TGA CCA CTA CCG AGA C<br>(R) ACATAAGCTTC ACG GCA GCA ACG AGT G                                                                                                | Forward (F) and reverse (R) primers for amplification of <i>cpe</i> from <i>S. viridis</i>                                         |

| <b>S1 Table (Continued)</b>   |                                                                             |                                                                                                                          |
|-------------------------------|-----------------------------------------------------------------------------|--------------------------------------------------------------------------------------------------------------------------|
| <i>cpe</i> -SK-F/R            | (F) ACTAGCATATG ATGATSRADVHWSCYGRT<br>(R) TGCAA AAGCTT TCAWSDYSGGRNYSSHKN   | Forward (F) and reverse (R) degenerate primers for amplification and cloning of <i>cpe</i> from <i>S. katsurahamanus</i> |
| <i>cpe</i> -SJ-F/R            | (F) ACTAG CATATG ATGATSRADVHWSCYGRT<br>(R) TGCAA AAGCTT TCAWSDYSGGRNYSSHKN  | Forward (F) and reverse (R) degenerate primers for amplification and cloning of <i>cpe</i> from <i>S. jumonjinensis</i>  |
| <i>cpe</i> <sup>Ct</sup> -F/R | (F) ATATCATATGATGGTCACGTGGAACGATGTC<br>(R) ATATGGATCCTCATCGCCGGGCGGCTTC     | Forward (F) and reverse (R) primers for amplification of the C-terminal domain of Cpe                                    |
| <i>cpe</i> <sup>Nt</sup> -F/R | (F) ATAATCATATGATGATGAAGAAAGCTGATTC<br>(R) ATATAGGATCCTCAGTCGGGTATGACGGTCTC | Forward (F) and reverse (R) primers for amplification of the N-terminal domain of Cpe                                    |
