# Supplementary material for: In vivo functional analysis of a class A β-lactamase-related protein essential for clavulanic acid biosynthesis in Streptomyces clavuligerus
Source: PubMed Central journal article supplement (PMC6478378; doi:10.1371/journal.pone.0215960), 2019-04-23
Supplement: pone.0215960.s008.pdf [file pone.0215960.s008.pdf]

**S2 Table.** Gene specific primer pairs used for RT-PCR analysis in the current study.

| <b>Gene</b>        | <b>Primer Function: Sequence (5'→3')</b>                        |
|--------------------|-----------------------------------------------------------------|
| <i>ceaS2</i>       | Forward: ATCGACTTCGTTCTGACCCG<br>Reverse: GGTGTCGTTCCGGGAAGATGT |
| <i>cas2</i>        | Forward: GCAAGCGGCTGGTGATGG<br>Reverse: GGTCTCCGAGGACAGGTAGTGC  |
| <i>oat2</i>        | Forward: CACCGTCCTCGCCTCCAC<br>Reverse: CGTTCCTCTCGCCCTCCAG     |
| <i>oppA1</i>       | Forward: CGGGGTACGGGGAGTGG<br>Reverse: CGGAGGAAGTTCAGGTGTA      |
| <i>claR</i>        | Forward: CGGGCGGCGTTCTT<br>Reverse: TCGTCGAGCAGGGGTTC           |
| <i>cyp</i>         | Forward: ACGAACTCGACGGCTATCTG<br>Reverse: ACATCGGGACCATCTCCTC   |
| <i>car</i>         | Forward: GTCTACCAGGCCACGAAGTT<br>Reverse: GATCCGCTGCTCGTACATCT  |
| <i>cpe (orf12)</i> | Forward: GGCGATGGGGCTGCTGAC<br>Reverse: GTGCGCGACGGGGTGGTA      |
| <i>orf13</i>       | Forward: CTGCGCTGGCTGCTGGTGTA<br>Reverse: CTGCCGCCGGGAGATGC     |
| <i>orf14</i>       | Forward: CGAACGACGACGAAACG<br>Reverse: CAGCGAGCCGACCATGT        |
| <i>oppA2</i>       | Forward: CCCACCTATCTCATCCCGC<br>Reverse: CATCAGATGGTCGAAGTCGGA  |
| <i>orf16</i>       | Forward: TTCCTGGCCGACATGACCAA<br>Reverse: CCGTACTTGCGCAGCAGATT  |
| <i>gcas</i>        | Forward: GGTCAACTGGAGCCTGTGTA<br>Reverse: CCGCGAACTTGGCATAGTC   |
| <i>pbpA1</i>       | Forward: CAAGTACCAGCGCACCTACA<br>Reverse: CGCTCAATACGCTGTCGAAC  |
| <i>hrdB</i>        | Forward: CGCGGCATGCTCTTCCT<br>Reverse: AGGTGGCGTACGTGGAGAAC     |
