# Supplementary material for: In vivo functional analysis of a class A β-lactamase-related protein essential for clavulanic acid biosynthesis in Streptomyces clavuligerus
Source: PubMed Central journal article supplement (PMC6478378; doi:10.1371/journal.pone.0215960), 2019-04-23
Supplement: pone.0215960.s009.pdf [file pone.0215960.s009.pdf]

**S3 Table.** Primer pairs used for site directed mutagenesis of *cpe*<sup>Sc</sup>.

| Primer           | Primer Sequence 5'→3'          | Forward/Reverse Primer |
|------------------|--------------------------------|------------------------|
| Cpe-Ser27Ala-F   | GCCCATGGGGGCGTCGTCGGCCG        | Forward                |
| Cpe-Ser27Ala-R   | CGGCCGACGACGCCCCATGGGC         | Reverse                |
| Cpe-Ser173Ala-F  | GCTTGTACGCCGCCCGGTCGGCAT       | Forward                |
| Cpe-Ser173Ala-R  | ATGCCGACCGGGGCGGCGTACAAGC      | Reverse                |
| Cpe- Tyr359Ala-F | CAGCAGACCGGGGCGGCGGTGAGGATC    | Forward                |
| Cpe- Tyr359Ala-R | GATCCTCACCGCCGCCCGGTCTGCTG     | Reverse                |
| Cpe-Ser206Ala-F  | CCCGTGGGCAGGGCGCGCAGCTCGGG     | Forward                |
| Cpe-Ser206Ala-R  | CCCGAGCTGCGCGCCCTGCCACGGG      | Reverse                |
| Cpe-Ser234Ala-F  | CGCCGGTGTGTCGGCCAGCGGATCATCT   | Forward                |
| Cpe-Ser234Ala-R  | AGATGATCGCGCTGGCCGACAACACCGGCG | Reverse                |
| Cpe-Lys375Ala-F  | GCTGGAACCGGCCGGAAGTAGACCCGGC   | Forward                |
| Cpe-Lys375Ala-R  | GCCGGGTCTACTTCGCGGCCGGTTCAGC   | Reverse                |
| Cpe-Ser378Ala-F  | ACCGGGGTGGCACCGCCCTGAAG        | Forward                |
| Cpe-Ser378Ala-R  | CTTCAAGGCCGGTGCCAGCCCCGT       | Reverse                |
| Cpe-Lys89Ala-F   | CACGACCCAGCCCGCTGCGCGACGGGG    | Forward                |
| Cpe-Lys89Ala-R   | CCCCGTGCGCACGCGGGCTGGGTCGTG    | Reverse                |
| Cpe-Trp91Ala-F   | CGACAGCACGACCGCGCCCTTGTGCGCG   | Forward                |
| Cpe-Trp91Ala-R   | CGCGCACAAGGGCGCGGTCGTGCTGTCG   | Reverse                |
| Cpe-Lys375Arg-F  | GAACCGGCCCTGAAGTAGACCCGGCGC    | Forward                |
| Cpe-Lys375ArgR   | GCGCCGGGTCTACTTCAGGGCCGGTTC    | Reverse                |
| Cpe-Arg418Lys-F  | CGGTCTGTTCTGGCCGGGATCGGGGCC    | Forward                |
| Cpe-Arg418Lys-R  | GGCGCCGATCCCGGCCAGGAACAGACCG   | Reverse                |
| Cpe-Arg311Ala-F  | CAGGTCCGAGCCGGCGACGGTCATACC    | Forward                |
| Cpe-Arg311Ala-R  | GGTGATGACCGTCGCCGGCTCCGACCTG   | Reverse                |
| Cpe-Glu321Ala-F  | GATGCCGAGCGCATGGACCGTCGCGCCC   | Forward                |

| <b>S3 Table (Continued)</b> |                                  |         |
|-----------------------------|----------------------------------|---------|
| Cpe-Glu321Ala-R             | GGGCGCGACGGTCCATGCGCTCGGCATC     | Reverse |
| Cpe-Trp326Ala-F             | GCTCGGCATCGACGCGCACATGGACGCC     | Forward |
| Cpe-Trp326Ala-R             | GGCGTCCATGTGCGCGTTCGATGCCGAGC    | Reverse |
| Cpe-Arg346Ala-F             | CCGCTGGTGTCCGCTCCGCTGTCCTGGA     | Forward |
| Cpe-Arg346Ala-R             | TCCAGGACAGCGGAGCGGACACCAGCGG     | Reverse |
| Cpe-Lys176Ala-F             | CGCATCAGATAGAGCGCGTACGCCGACCCGGT | Forward |
| Cpe-Lys176Ala-R             | ACCGGGTCGGCGTACGCGCTCTATCTGATGCG | Reverse |
| Cpe-Arg115Ala-F             | CAGGGTGAGGATGGCGATCAGCCCGCTG     | Forward |
| Cpe-Arg115Ala-R             | CAGCGGGCTGATCGCCATCCTCACCTG      | Reverse |
