# Supplementary material for: In vivo functional analysis of a class A β-lactamase-related protein essential for clavulanic acid biosynthesis in Streptomyces clavuligerus
Source: PubMed Central journal article supplement (PMC6478378; doi:10.1371/journal.pone.0215960), 2019-04-23
Supplement: pone.0215960.s010.pdf [file pone.0215960.s010.pdf]

**S4 Table.** LC-MS analysis of SA culture supernatants from wt *S. clavuligerus* and  $\Delta$ *cpe-INTF* mutant strains for detecting clavulanic acid and pathway intermediates.

| Strain (plasmid) <sup>a</sup>                                        | Metabolite <sup>b,c</sup>             |                                                         |                                                         |                                                                |                                                         |                                     |                                        |
|----------------------------------------------------------------------|---------------------------------------|---------------------------------------------------------|---------------------------------------------------------|----------------------------------------------------------------|---------------------------------------------------------|-------------------------------------|----------------------------------------|
|                                                                      | Clavaminc acid ( <i>m/z</i> =223/155) | <i>N</i> -acetyl clavaminic acid ( <i>m/z</i> =265/197) | <i>N</i> -glycyl clavaminic acid ( <i>m/z</i> =280/212) | <i>N</i> -acetyl glycyl clavaminic acid ( <i>m/z</i> =322/254) | <i>C</i> -glycyl clavaminic acid ( <i>m/z</i> =324/256) | Clavaldelyde ( <i>m/z</i> =222/154) | Clavulanic acid ( <i>m/z</i> =224/156) |
| wt                                                                   | -                                     | -                                                       | -                                                       | -                                                              | -                                                       | -                                   | +                                      |
| $\Delta$ <i>cpe-INTF</i>                                             | -                                     | -                                                       | -                                                       | -                                                              | -                                                       | -                                   | -                                      |
| $\Delta$ <i>cpe-INTF</i> (pSET: <i>cpe</i> <sup>Sc</sup> )           | -                                     | -                                                       | -                                                       | -                                                              | -                                                       | -                                   | +                                      |
| $\Delta$ <i>cpe-INTF</i> (pSET: <i>cpe</i> <sup>Sc-Trp91Ala</sup> )  | -                                     | -                                                       | -                                                       | -                                                              | -                                                       | -                                   | +                                      |
| $\Delta$ <i>cpe-INTF</i> (pSET: <i>cpe</i> <sup>Sc-Ser173Ala</sup> ) | -                                     | -                                                       | -                                                       | -                                                              | -                                                       | -                                   | -                                      |
| $\Delta$ <i>cpe-INTF</i> (pSET: <i>cpe</i> <sup>Sc-Lys176Ala</sup> ) | -                                     | -                                                       | -                                                       | -                                                              | -                                                       | -                                   | -                                      |
| $\Delta$ <i>cpe-INTF</i> (pSET: <i>cpe</i> <sup>Sc-Ser234Ala</sup> ) | -                                     | -                                                       | -                                                       | -                                                              | -                                                       | -                                   | -                                      |
| $\Delta$ <i>cpe-INTF</i> (pSET: <i>cpe</i> <sup>Sc-Gln321Ala</sup> ) | -                                     | -                                                       | -                                                       | -                                                              | -                                                       | -                                   | +                                      |
| $\Delta$ <i>cpe-INTF</i> (pSET: <i>cpe</i> <sup>Sc-Tyr359Ala</sup> ) | -                                     | -                                                       | -                                                       | -                                                              | -                                                       | -                                   | -                                      |
| $\Delta$ <i>cpe-INTF</i> (pSET: <i>cpe</i> <sup>Sc-Lys375Ala</sup> ) | -                                     | -                                                       | -                                                       | -                                                              | -                                                       | -                                   | -                                      |
| $\Delta$ <i>cpe-INTF</i> (pHM: <i>cpe</i> <sup>Ct</sup> )            | -                                     | -                                                       | -                                                       | -                                                              | -                                                       | -                                   | -                                      |

<sup>a</sup> Select strains were fermented for 96 hours and culture supernatants were subjected to LC-MS analysis after imidazole derivatization.

<sup>b</sup> Metabolites and respective *m/z* values of corresponding imidazole derivatives/fragmentation products/ions are indicated. Some clavaminic acid derived 5S metabolites reported to accumulate in certain *S. clavuligerus* mutant strains were also included in the analysis.

<sup>c</sup> (+) and (-) indicates that ions corresponding the metabolite were either detected or not detected in culture supernatants during analysis, respectively.
