# Supplementary material for: In vivo functional analysis of a class A β-lactamase-related protein essential for clavulanic acid biosynthesis in Streptomyces clavuligerus
Source: PubMed Central journal article supplement (PMC6478378; doi:10.1371/journal.pone.0215960), 2019-04-23
Supplement: pone.0215960.s011.pdf [file pone.0215960.s011.pdf]

**S5 Table.** LC-MS analysis of soy medium culture supernatants from wt *S. clavuligerus* and  $\Delta cpe-1NF$  mutant strains for detecting 5S clavam production.

| Strain (plasmid) <sup>a</sup>                      | Metabolite <sup>b,c</sup>            |                                    |                               |
|----------------------------------------------------|--------------------------------------|------------------------------------|-------------------------------|
|                                                    | 2-Hydroxymethyl clavam (m/z=144/212) | Clavam-2-carboxylate (m/z=138/226) | Clavulanic acid (m/z=156/224) |
| wt                                                 | +                                    | +                                  | +                             |
| $\Delta cpe-1NF$                                   | +                                    | +                                  | -                             |
| $\Delta cpe-1NF$ (pSET: <i>cpe</i> <sup>Sc</sup> ) | +                                    | +                                  | +                             |
| $\Delta cpe-1NF$ (pHM: <i>cpe</i> <sup>Ct</sup> )  | +                                    | +                                  | -                             |

<sup>a</sup> Select strains were fermented for 96 hours and culture supernatants were subjected to LC-MS analysis after imidazole derivatization.

<sup>b</sup> Metabolites and respective *m/z* values of corresponding imidazole derivatives/fragmentation products/ions are indicated, where (+ and -) indicate that ions corresponding to the metabolite were either present or was not detected in culture supernatants, respectively.

<sup>c</sup> The presence of 2-hydroxymethyl clavam and clavam-2-carboxylate was used to monitor 5S clavam production since the metabolites produced as part of a common biosynthetic pathway in *S. clavuligerus*.
